# Supplementary material for: Case report: Extending the spectrum of clinical and molecular findings in FOXC1 haploinsufficiency syndrome
Source: PubMed Central journal article supplement (PMC10326848; doi:10.3389/fgene.2023.1174046), 2023-06-23
Supplement: Table1.pdf [file Table1.pdf]

## **SUPPLEMENTARY INFORMATION 1**

List of the genes with involved TADs in the rearrangement of patient 1.

TFAP2A  
GCNT2  
C6orf52  
PAK1IP1  
TMEM14C  
TMEM14B  
ENSG00000272162  
MAK  
GCM2  
SYCP2L  
ELOVL2  
FOXQ1  
FOXF2  
FOXC1  
GMDS  
MYLK4  
WRNIP1  
SERPINB1  
SERPINB9  
SERPINB6  
NQO2  
RIPK1  
BPHL  
TUBB2A  
TUBB2B  
PSMG4  
SLC22A23  
PXDC1  
FAM50B  
PRPF4B  
FAM217A  
ECI2  
CDYL  
RPP40  
PPP1R3G  
LYRM4  
FARS2  
NRN1  
F13A1  
LY86  
RREB1  
SSR1  
CAGE1  
RIOK1  
DSP  
SNRNP48  
BMP6

TXNDC5  
BLOC1S5-TXNDC5  
BLOC1S5  
EEF1E1-BLOC1S5  
EEF1E1  
SLC35B3
